# Supplementary material for: Assembly of highly efficient overall CO2 + H2O electrolysis cell with the matchup of CO2 reduction and water oxidation catalyst
Source: Royal Society of Chemistry journal article supplement (doi:10.1039/d3dt02599c), 2023-01-01
Supplement: d3dt02599c1.pdf [file d3dt02599c1.pdf]

## Supporting Informations

### **Assembly of Highly Overall CO<sub>2</sub>+H<sub>2</sub>O Cell with the Matchup of CO<sub>2</sub> Reduction and Water Oxidation Catalyst**

Zhang Li, Hong-Lin Zhu, Zhong-Yi Li, Yue-Qing Zheng\*

Research Center of Applied Solid State Chemisty, Chemistry Institute for Synthesis  
and Green Application, Ningbo University, Ningbo, 315211, P. R. China

\*Corresponding author: Yue-Qing Zheng

E-mail address: zhengyueqing@nbu.edu.cn

Tel/fax: +86 574 87600747

## 1.1 Characterization

The Powder X-ray diffraction was carried out with a Bruker D<sub>8</sub> Focus X-ray diffractometer with Cu-K $\alpha$  radiation ( $\lambda = 1.54178 \text{ \AA}$ ). The C, H and N microanalyses were performed with a Perkin Elmer 2400II elemental analyzer. Thermogravimetric measurements were carried out from room temperature to 800°C on preweighed samples using a Seiko Exstar 6000 TG/DTA 6300 apparatus with a heating rate of 10°C/min. The X-ray photoelectron spectroscopy (XPS) was obtained on Escalab 250Xi instrument with a monochromatic Al K $\alpha$  X-ray radiation source. The content of metal ions was determined by inductively coupled plasma optical emission spectrometer (ICAP 7200 ICP-OES). Scanning Electron Microscope (SEM) analysis was performed by using a Hitachi's new SU-70 type of thermal field emission instruments. The low and high resolution transmission electron microscopy (TEM) and the corresponding energy dispersive spectroscopy mapping analyses were performed on JME-2100. The liquid products were performed by Bruker 400 HZ NMR spectroscopy with TMS as an internal standard. The content of CO was analyzed by gas chromatograph (GC-2060) with flame ionization detector (FID).

## 1.2 Evaluation of electrochemical activity of OER

The working electrode was prepared by dispersing 2.5 mg of  $\gamma$ -NiOOH/NiCO<sub>3</sub>/Ni(HCOO)<sub>2</sub> catalyst into a mixture of 60  $\mu\text{L}$  Nafion solution, 300  $\mu\text{L}$  isopropyl alcohol and 200  $\mu\text{L}$  deionized water with 30 min of sonication. 58  $\mu\text{L}$  well dispersed catalyst ink was drop casted onto the carbon cloth of 1.0 cm<sup>2</sup> in geometric area. All electrochemical measurements were performed in an electrochemical workstation (CHI 760E, Shanghai) with a three-electrode system. The as-synthesized

$\gamma$ -NiOOH/NiCO<sub>3</sub>/Ni(HCOO)<sub>2</sub> electrode as working electrode (1 cm×1 cm), the Pt wire electrode as counter electrode and an Ag/AgCl electrode (saturated KCl) was used as reference electrode. All electrochemical tests were performed in 1 M KOH electrolyte and carried out at 298K temperature. All electrode potential were transformed to the reversible hydrogen electrode (RHE), the equation: E (RHE) = E (Ag/AgCl) + 0.197 V+0.0591\*pH, and the overpotential ( $\eta$ ) was derived from the formula:  $\eta = E_{RHE}-1.23$  V.

### 1.3 Evaluation of electrochemical reduction CO<sub>2</sub>

The working electrode was prepared by dispersing 5.0 mg CoPc/Fe-N-C in a mixture of 100  $\mu$ L Nafion solution, 600  $\mu$ L isopropyl alcohol and 400  $\mu$ L deionized water with 30 min of sonication. 35  $\mu$ L well dispersed catalyst ink was drop casted onto the carbon cloth. The electrochemical measurements were carried out with three-electrode system in 0.5 M KHCO<sub>3</sub> solution on CHI 760E electrochemical workstation (ChenHua, Shanghai). The as-synthesized CoPc/Fe-N-C electrode was used as the working electrode, Pt foil and Ag/AgCl electrode was denoted as counter electrode and reference electrode, respectively. All the measured potentials vs. Ag/AgCl were converted to reversible hydrogen electrode (RHE):  $E_{RHE} = E_{Ag/AgCl} + 0.059 \times \text{pH} + 0.197$  V. The value of Faradaic efficiency (FE) was calculated according to the formula:  $FE = 2F \times n_{CO} / Q = 2F \times n_{CO} / (I \times t)$ , where F is 96485 C/mol and  $n_{CO}$  is the molar mass of CO. The TOF value of the electrocatalyst via mass loading was

calculated as follows:  $TOF(S^{-1}) = \frac{I \cdot FE / 2F}{m \cdot \omega / M_r}$ , where I is the current, m is the catalyst mass in the electrode,  $\omega$  is the Co loading in the catalyst,  $M_r$  is the atomic mass of Co

with  $58.9 \text{ g mol}^{-1}$ . The value of TOF was also carried out by electrochemical surface area (ECSA) normalization with EDLC value of graphene. The ECSA was calculated by the electrochemical double-layer capacitance (Cdl) with the cyclic voltammetry (CV) curves in non-Faradaic potential region.

#### 1.4 Evaluation of overall $\text{CO}_2+\text{H}_2\text{O}$ coupling electrocatalysis

The overall  $\text{CO}_2+\text{H}_2\text{O}$  electrocatalysis was performed on a H-cell electrolyzer with a Nafion117 membrane to separate the cathode and anode. The anode was heterostructured  $\gamma\text{-NiOOH/NiCO}_3/\text{Ni(HCOO)}_2$  nanosheet in the media of 1 M KOH electrolyte, and CoPc/Fe-N-C was used as cathode in 0.5 M  $\text{KHCO}_3$  electrolyte.

| H              |            |                |        |              |                     |
|----------------|------------|----------------|--------|--------------|---------------------|
| Sample Name    | H          | Pulse sequence | onapul | Temperature  | 28                  |
| Date collected | 2021-10-29 | Solvent        | none   | Spectrometer | Agilent-NMR-vnmr500 |
|                |            |                |        | Study owner  | vnmr1               |
|                |            |                |        | Operator     | Solid               |

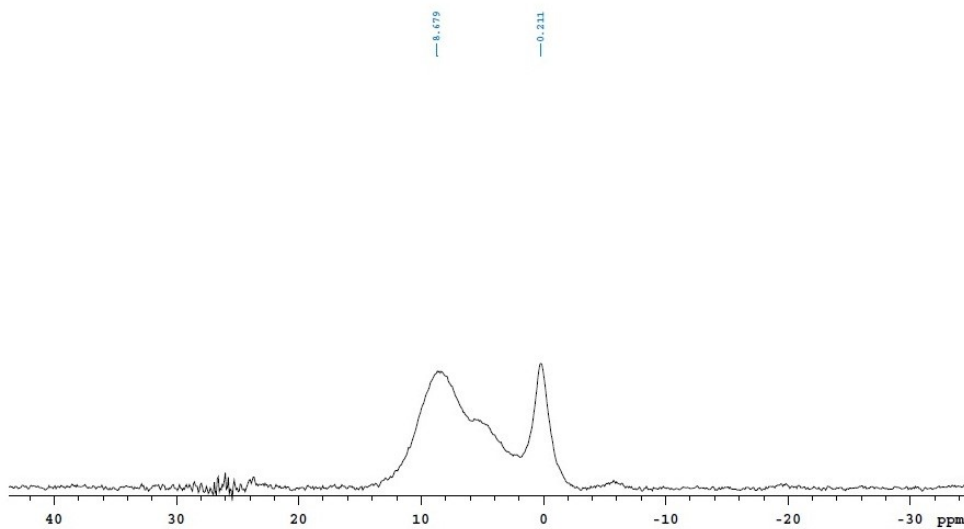

Figure S1 The solid state  $^1\text{H}$  NMR of  $\gamma\text{-NiOOH/NiCO}_3\text{/Ni(HCOO)}_2$ .

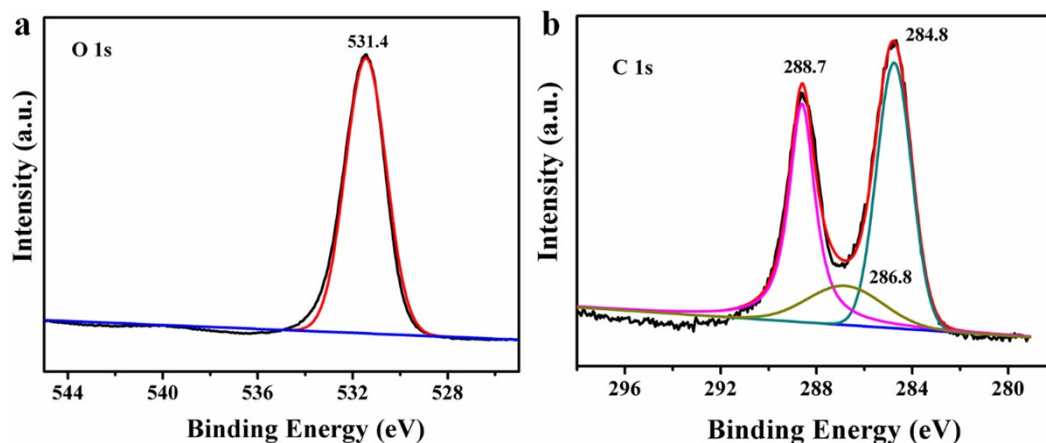

Figure S2 XPS spectra of the O 1s and C 1s for  $\gamma\text{-NiOOH/NiCO}_3\text{/Ni(HCOO)}_2$ .

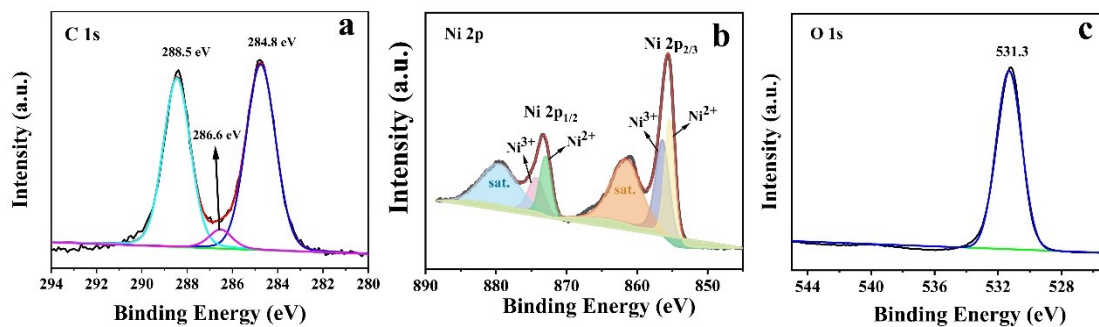

Figure S3 XPS spectra of the C 1s (a), O 1s(b), and Ni 2p (c) for  $\gamma\text{-NiOOH/NiCO}_3\text{/Ni(HCOO)}_2$ .

NiOOH/NiCO<sub>3</sub>/Ni(HCOO)<sub>2</sub> at the end of the electrochemical tests.

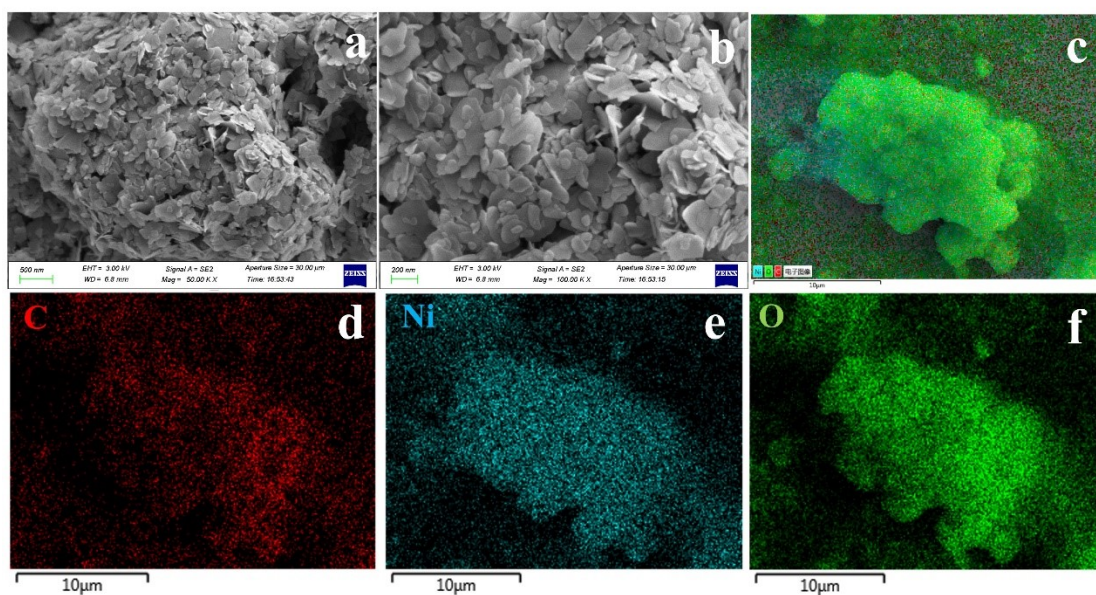

Figure S4 (a, b) SEM spectra and Corresponding C (d), Ni (e), and O (f) elemental mapping of  $\gamma$ -NiOOH/NiCO<sub>3</sub>/Ni(HCOO)<sub>2</sub> at the end of the electrochemical tests.

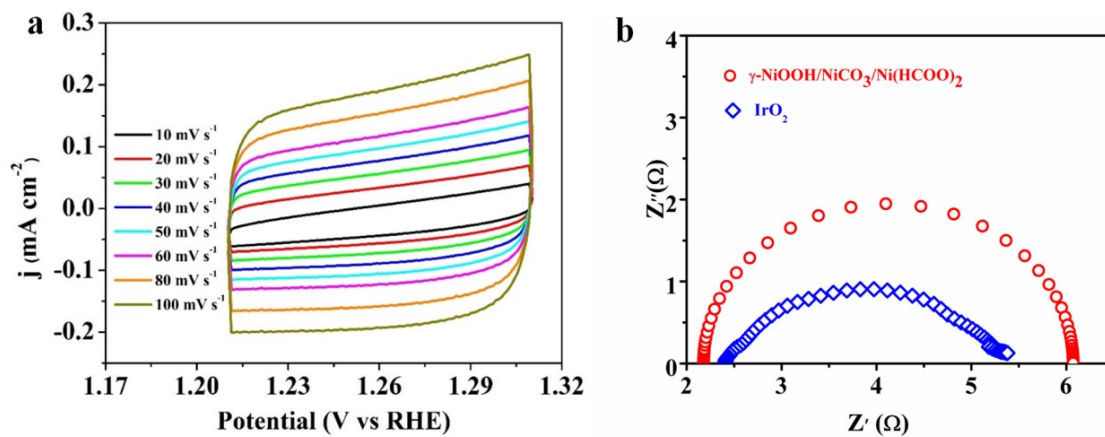

Figure S5 (a) CV curves of  $\gamma$ -NiOOH/NiCO<sub>3</sub>/Ni(HCOO)<sub>2</sub> with different scan rate. (b)

Nyquist plots of  $\gamma$ -NiOOH/NiCO<sub>3</sub>/Ni(HCOO)<sub>2</sub> and IrO<sub>2</sub>.

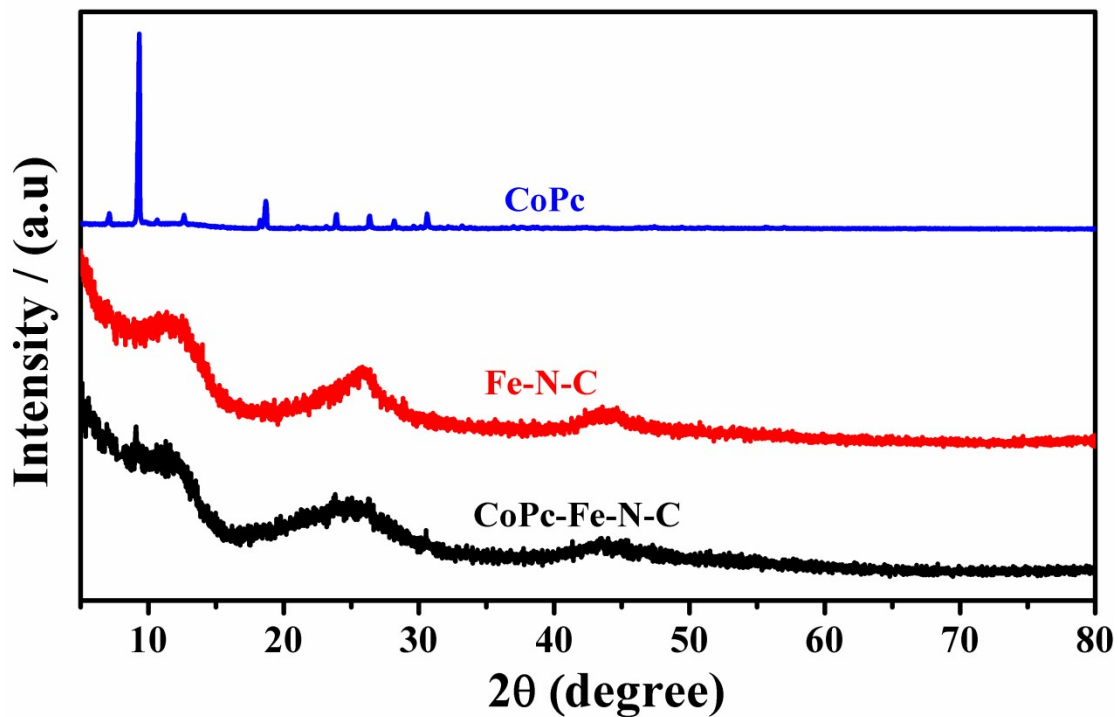

Figure S6 XRD patterns of CoPc/Fe-N-C.

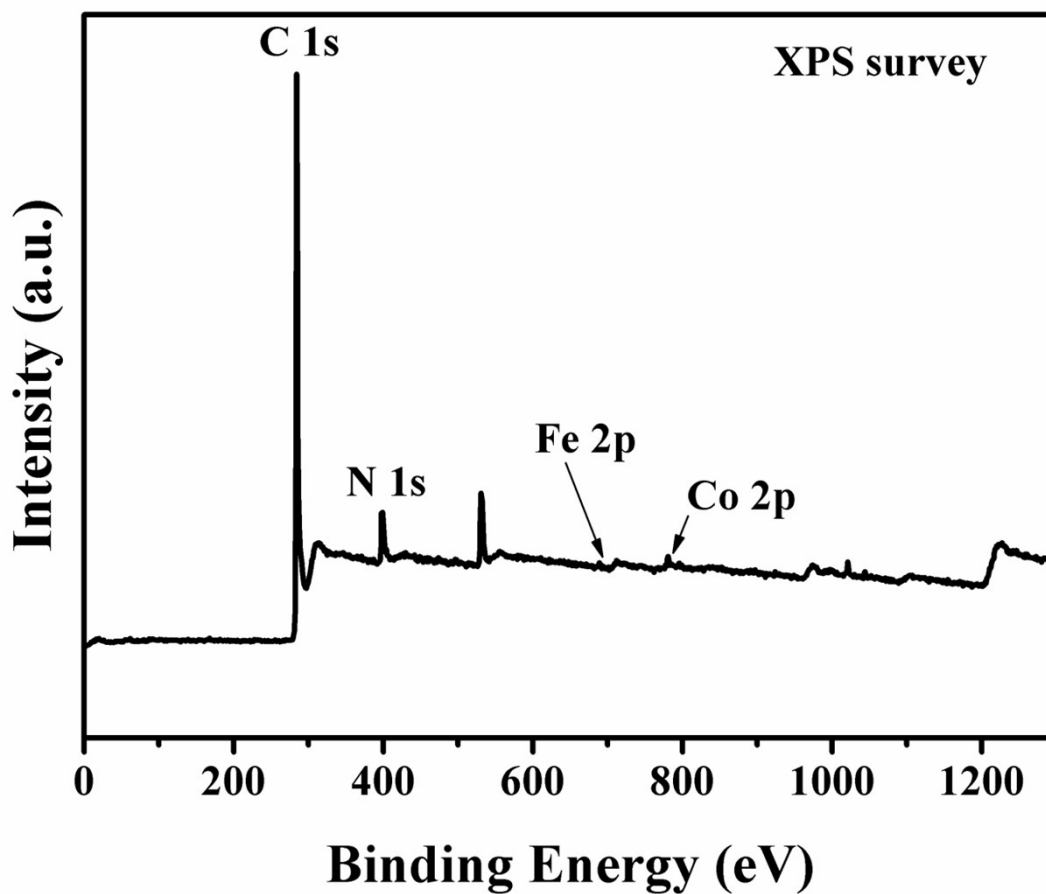

Figure S7 XPS spectra of CoPc/Fe-N-C.

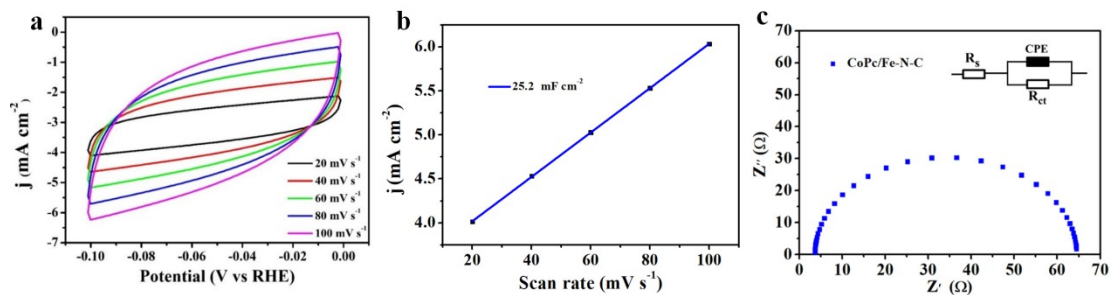

Figure S8 (a) CVs plots in the non-faradaic potential of CoPc/Fe-N-C. (b) Current densities against the scan rates of CoPc/Fe-N-C. (c) Nyquist plot of CoPc/Fe-N-C.

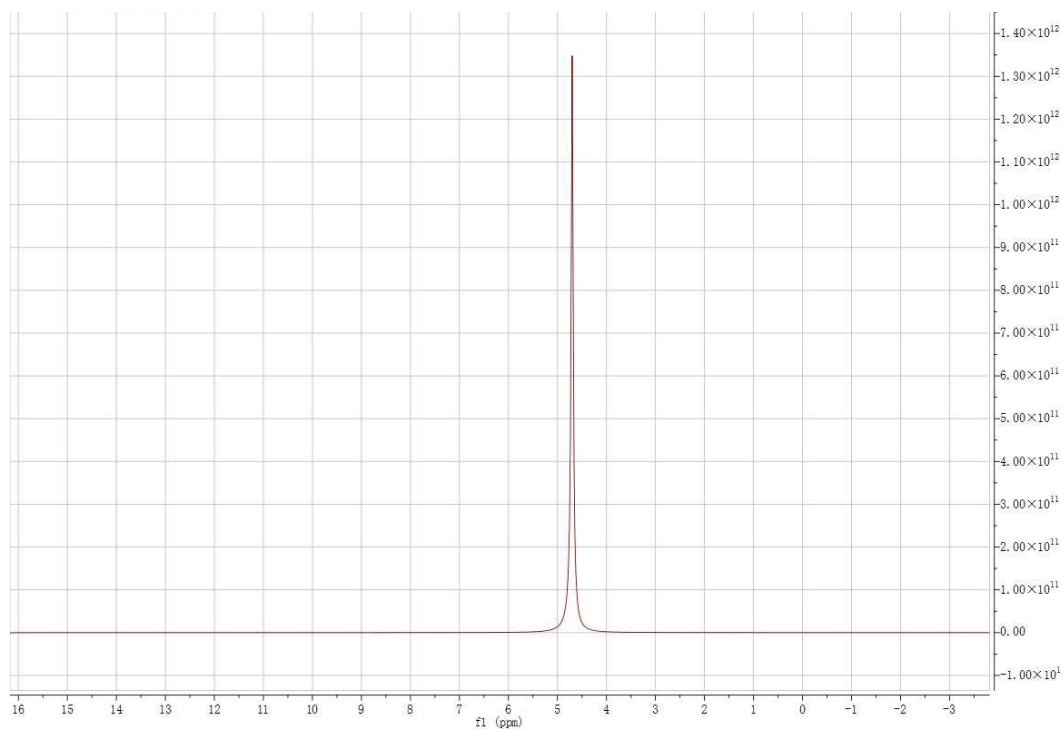

Figure S9  $^1\text{H}$  NMR spectrum of electrolysis liquid product for CoPc/Fe-N-C.



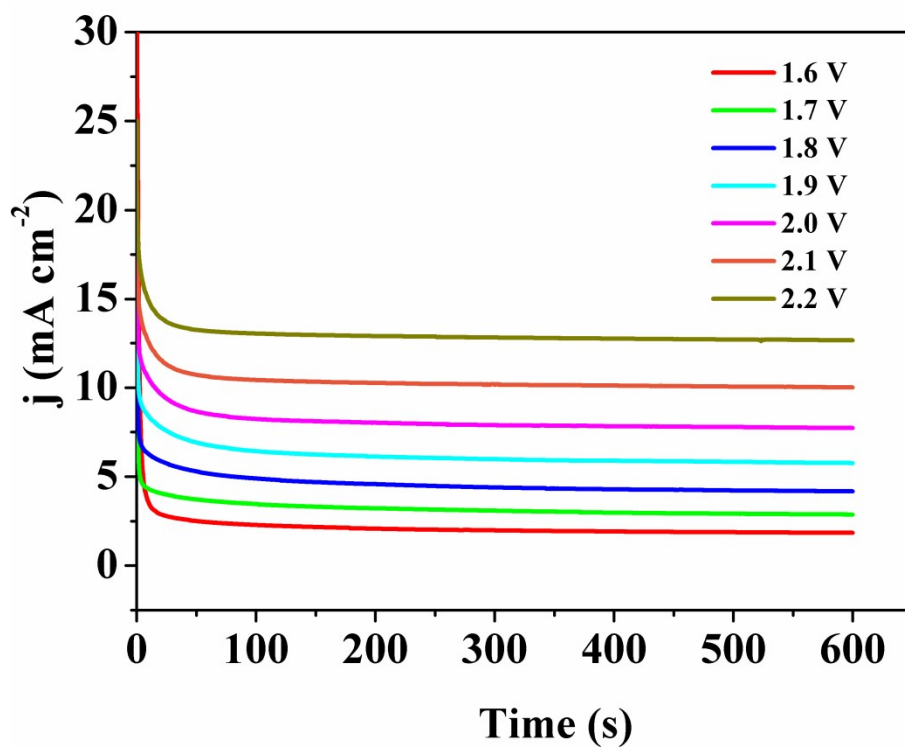

Figure S10 Current densities of overall cell at various potentials.

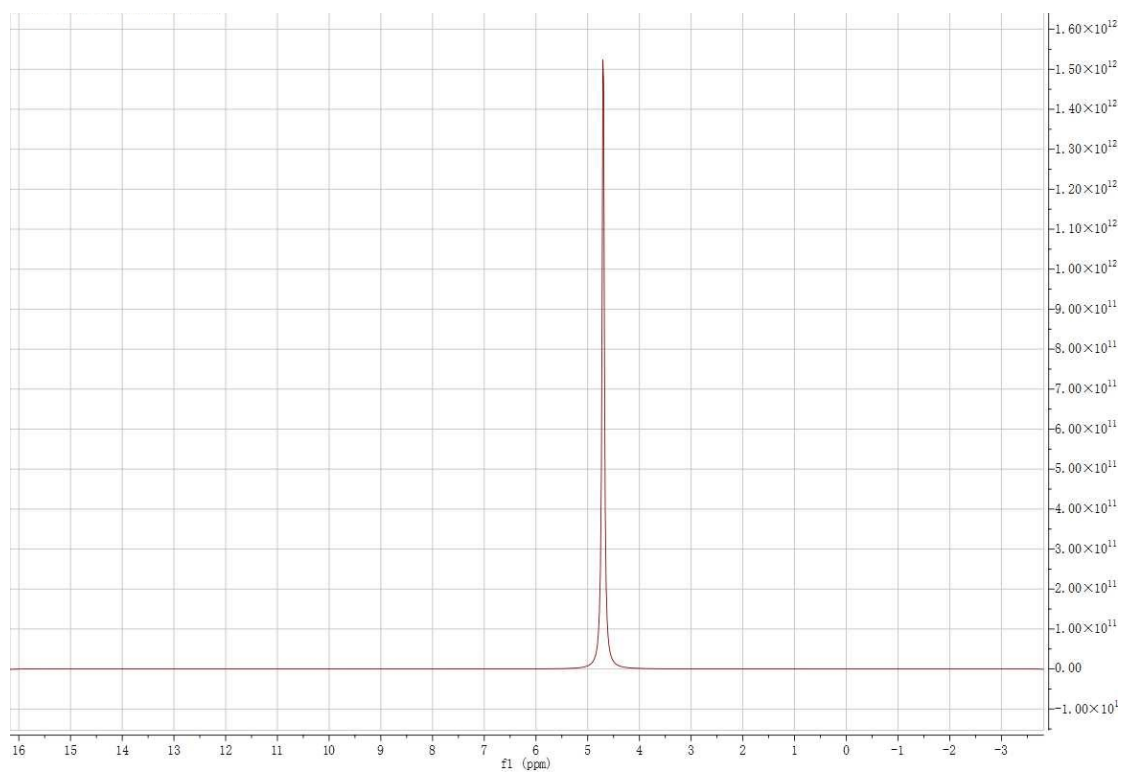

Figure S11  $^1\text{H}$  NMR spectrum of electrolysis liquid product for overall  $\text{CO}_2 + \text{H}_2\text{O}$  reaction.
